# Supplementary material for: New β-Carotene-Chitooligosaccharides Complexes for Food Fortification: Stability Study
Source: PubMed Central journal article supplement (PMC7353500; doi:10.3390/foods9060765), 2020-06-10
Supplement: foods-09-00765-s001.pdf [file foods-09-00765-s001.pdf]

## Supplementary data

### **New $\beta$ -carotene-chitooligosaccharides complexes for food fortification: stability study**

Alma Bockuviene <sup>a,b</sup>, Jolanta Sereikaite <sup>a,\*</sup>

<sup>a</sup> Department of Chemistry and Bioengineering, Vilnius Gediminas Technical University, Vilnius, Lithuania

<sup>b</sup> Department of Polymer Chemistry, Institute of Chemistry, Vilnius University, Vilnius, Lithuania

\*To whom correspondence should be addressed:

Jolanta Sereikaite

Department of Chemistry and Bioengineering

Faculty of Fundamental Sciences, Vilnius Gediminas Technical University

Sauletekio al. 11, LT-10223, Vilnius-40, Lithuania

Telephone: +370 5 2744972; e-mail: jolanta.sereikaite@vgtu.lt

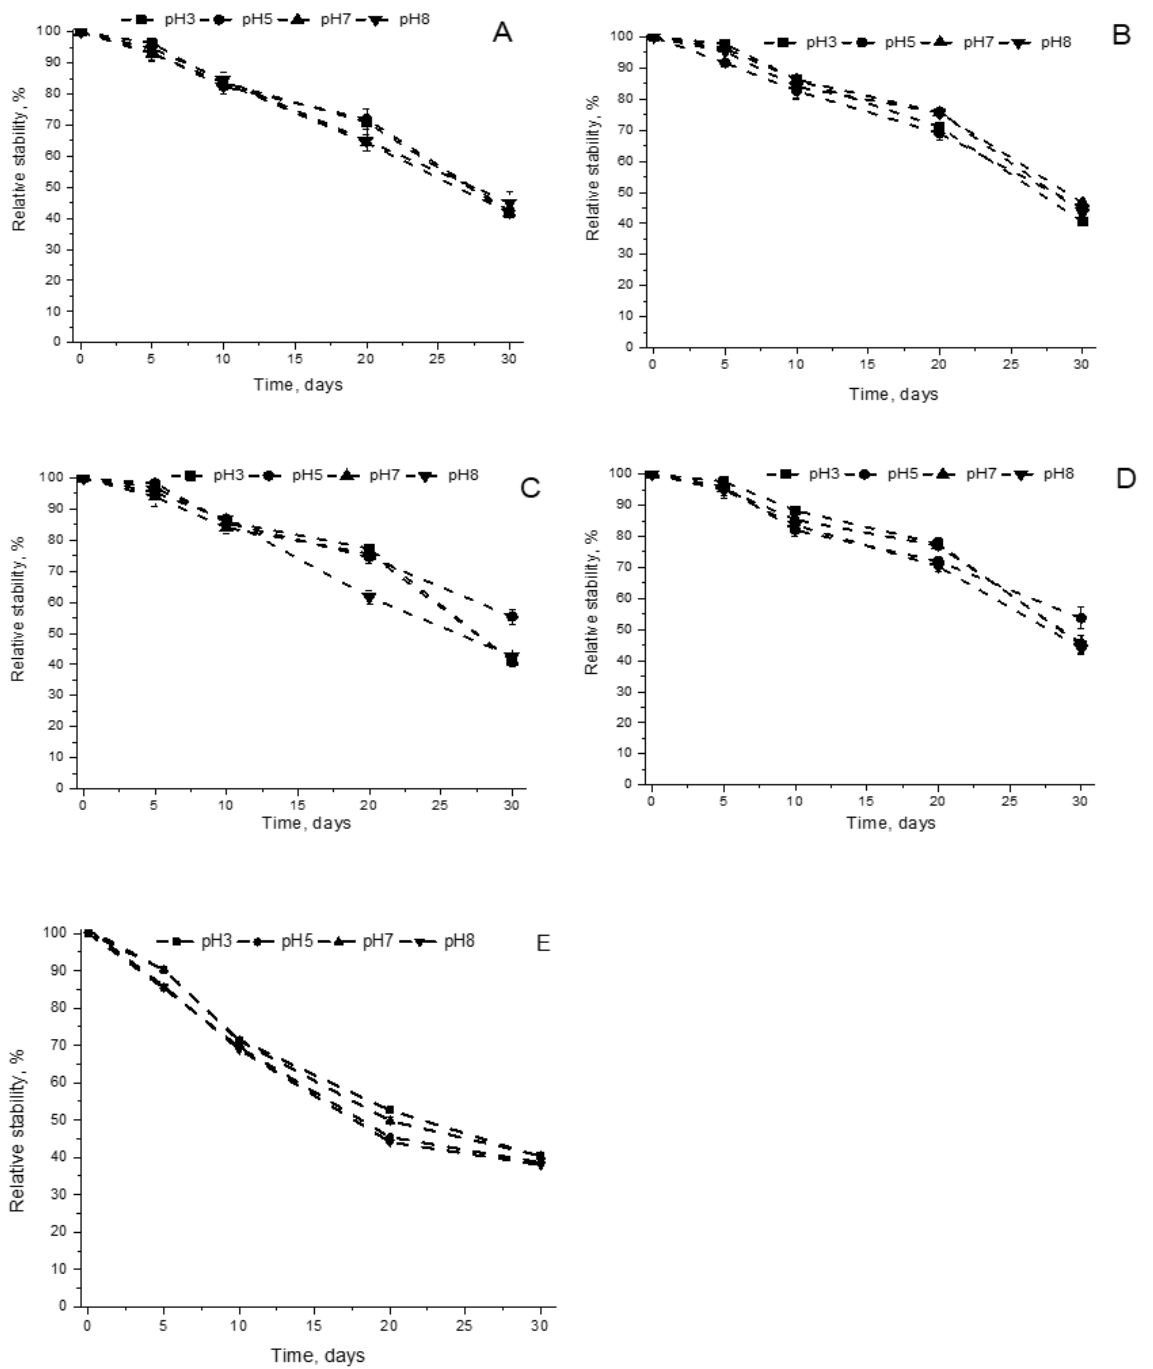

Fig. S1. The effect of pH on CAR stability during the storage of CAR-CHIOS complexes LF4 (A), LF5 (B), S6 (C), S7 (D) and KD3 (E) in the dark at 24 °C. Each value is expressed as mean  $\pm$  standard deviation (n=3).

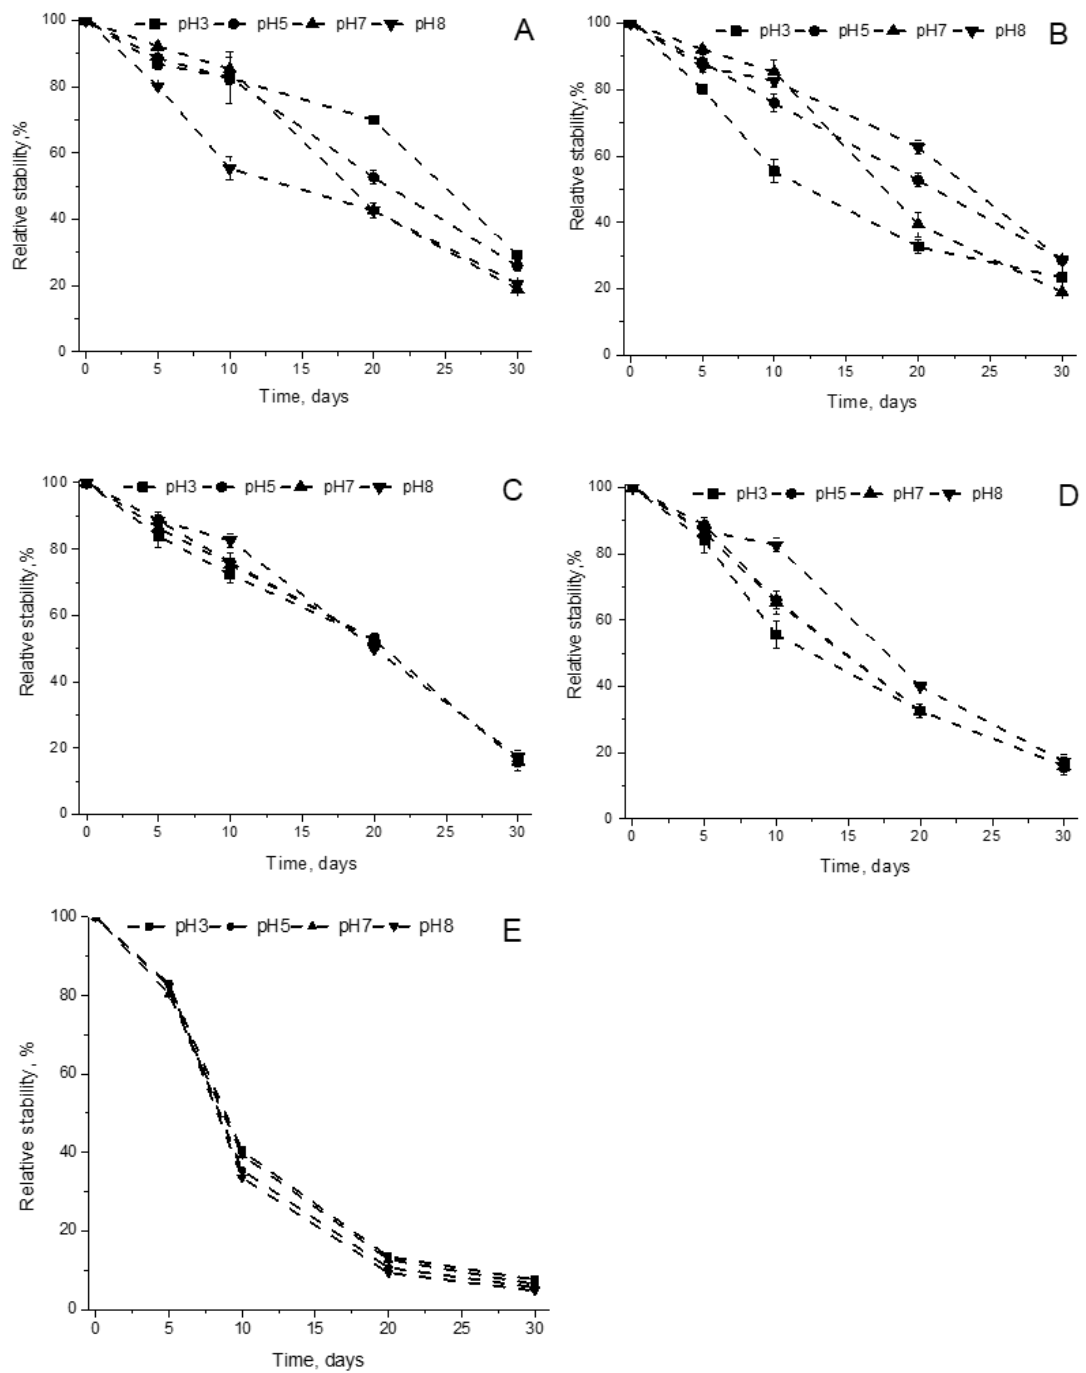

Fig. S2 The effect of pH on CAR stability during the storage of CAR-CHIOS complexes LF4 (A), LF5 (B), S6 (C), S7 (D) and KD3 (E) in the light at 24 °C. Each value is expressed as mean  $\pm$  standard deviation (n=3).

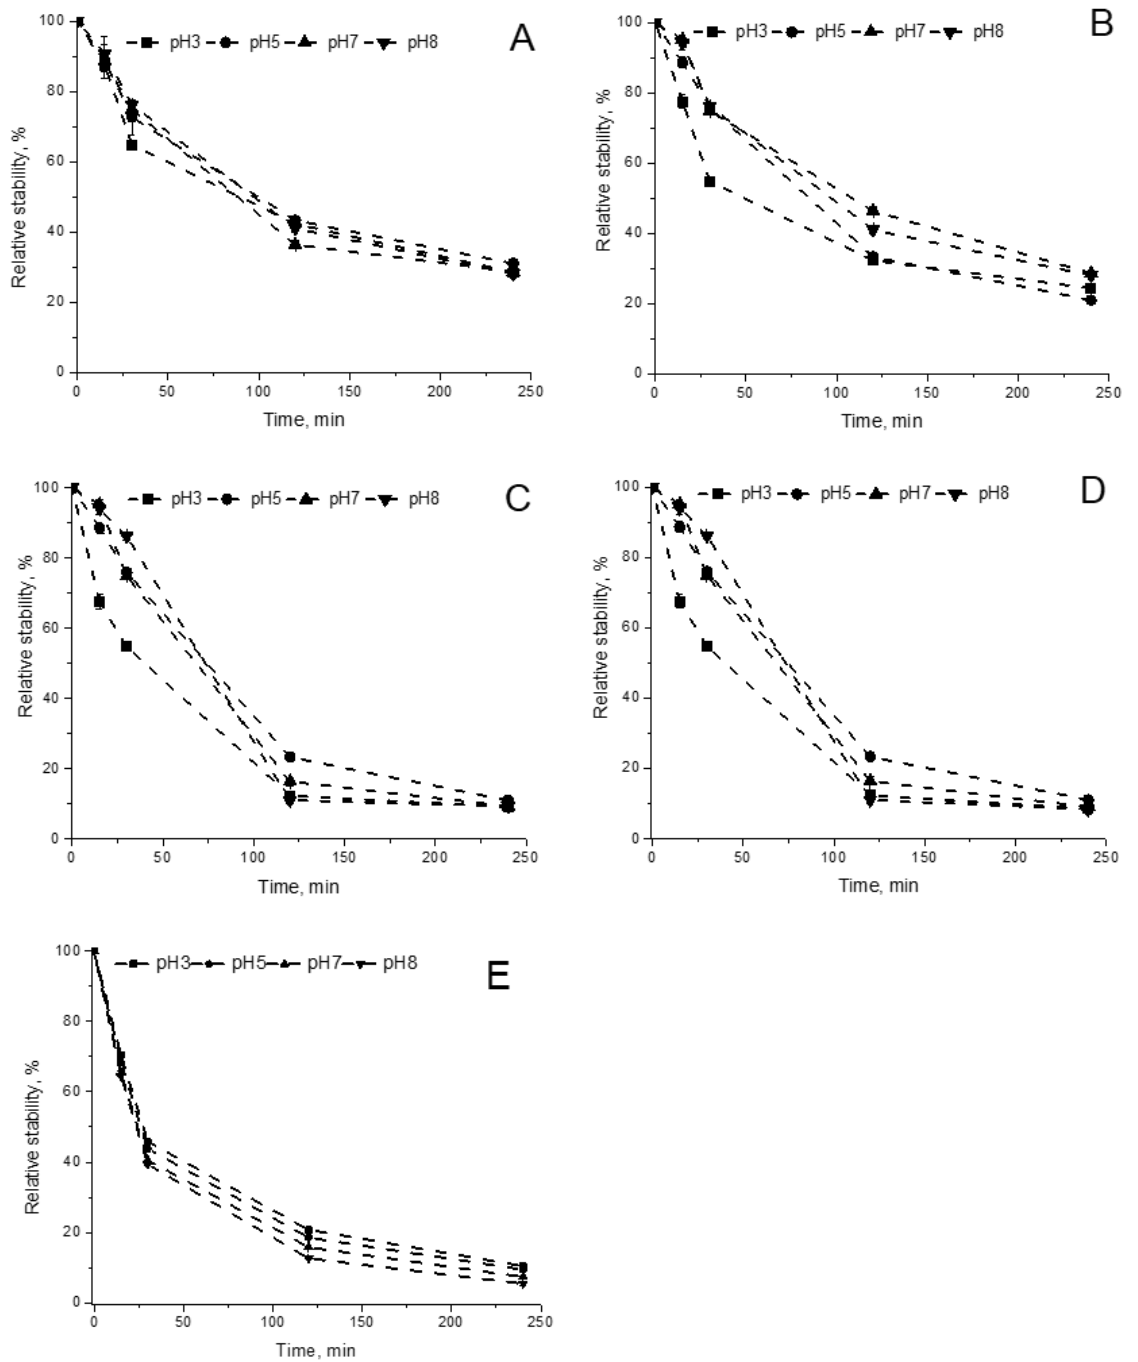

Fig. S3. The stability of CAR during UV irradiation treatment of CAR-CHIOS complexes LF4 (A), LF5 (B), S6 (C), S7 (D) and KD3 (E) at different pH values. Each value is expressed as mean  $\pm$  standard deviation (n=3).
